# Effect of daily human movement on some characteristics of dengue dynamics

Mayra R. Tocto-Erazo <sup>a,\*</sup>, Daniel Olmos-Liceaga<sup>a</sup>, Jose A. Montoya-Laos<sup>a</sup>

<sup>a</sup> *Departamento de Matemáticas, División de Posgrado. Universidad de Sonora, 83000, Hermosillo, México*

---

## Abstract

Human movement is a key factor in infectious diseases spread such as dengue. Here, we explore a mathematical modeling approach based on a system of ordinary differential equations to study the effect of human movement on characteristics of dengue dynamics such as the existence of endemic equilibria, and the start, duration, and amplitude of the outbreak. The model considers that every day is divided into two periods: high-activity and low-activity. Periodic human movement between patches occurs in discrete times. Based on numerical simulations, we show unexpected scenarios such as the disease extinction in regions where the local basic reproductive number is greater than 1. In the same way, we obtain scenarios where outbreaks appear despite the fact that the local basic reproductive numbers in these regions are less than 1 and the outbreak size depends on the length of high-activity and low-activity periods.

*Keywords:* Mathematical model, dengue, human movement, patches, outbreak.

---

## 1. Introduction

Dengue is an endemic disease in many countries around the world, mainly throughout the tropics [1, 2]. It is estimated that there are a total of 3.97 billion people at risk of dengue transmission [3]. Risk levels depend strongly on rainfall, temperature and the degree of urbanization [1]. Human movement is also a key component of the transmission dynamics of many vector-borne diseases [4, 5]. For example, dengue infections has been related to travel to endemic places such as the Caribbean, South America, South-Central Asia, and Southeast Asia [6].

In urban areas, human movement is frequent and extensive but often composed of commuting patterns between homes and places of employment, education or commerce [7]. At this scale, commuting people occurs day-to-day, dominated by daily activities. In a study conducted at two factories in Bandung [8], authors suggest that some people may have acquired the dengue virus at work and not at home. Therefore, local human movement plays an important role in the temporal and spatial spread of the dengue disease.

From the mathematical point of view, the role of the human movement on vector-borne diseases

---

\*Corresponding author

1 from various perspectives has been studied. In particular, ordinary differential equations have  
2 been used to model the human mobility between two or more locations [9]. One approach is  
3 the continuous moving of the human population between places [10–15]. Other proposal is the  
4 residence time, which represents the proportion of time that human budget their residence across  
5 regions [16–19]. However, other approach is to explicitly consider the daily movement of people on  
6 the dynamics. This approach has been studied in [20], where the authors formulate a star-network  
7 of connections between a central city and peripheral villages. Also, they suppose the commute  
8 population is the same every day and the movement period to the central city is half a day.  
9 Despite there are studies about the human movement from different approaches, it has been poorly  
10 understood.

11 In this work, our objective is to study the effect of the daily periodic movement on dengue  
12 dynamics such as the existence of endemic equilibria, and the start, duration and, amplitude of the  
13 outbreak. We formulate a two-patch model based on a system of ordinary differential equations  
14 and incorporate human daily movement, where movement takes place at periodic discrete times  
15 every day as in [20]. Every day is divided into two periods: low-activity and high-activity, which  
16 could represent night and day, respectively. We consider that the low-activity period represents  
17 the time interval where humans stay at their residence patch. The movement takes place during  
18 the high-activity period in which people commute to school, work or other daily activities; also  
19 a high-activity period can be related to extraordinary events where large numbers of humans  
20 interact. To study this model, we first analyze the patches separately without considering a  
21 piecewise definition in time. Then, based on numerical simulations, we study the complete model  
22 to observe some effects of the human periodic movement on the dynamics.

23 This work is divided in the following sections. The formulation of the model and the analysis  
24 of uncoupled patches is given in Section 2. Then, in Section 3, we study the effect of daily human  
25 movement on some characteristics of model dynamics based on numerical studies under some  
26 scenarios. Finally, conclusions and discussions about our results are presented in Section 4.

## 27 **2. Formulation of model**

28 The classic vector-host mathematical model is given by the following system

$$\begin{aligned}\dot{S}(t) &= \mu_h N - \frac{\beta S(t)Q(t)}{N} - \mu_h S(t), \\ \dot{I}(t) &= \frac{\beta S(t)Q(t)}{N} - (\delta + \mu_h)I(t), \\ \dot{R}(t) &= \delta I(t) - \mu_h R, \\ \dot{P}(t) &= \Lambda - \frac{\beta_v Q(t)I(t)}{N} - \mu_v P(t), \\ \dot{Q}(t) &= \frac{\beta_v Q(t)I(t)}{N} - \mu_v Q(t),\end{aligned}\tag{1}$$

1 where  $S$ ,  $I$  and  $R$  represent the susceptible, infected and recovered population, respectively, and  
2  $P$  y  $Q$  the susceptible and infected mosquito population, respectively.

3 We include the daily periodic movement between two patches in model (1) as follows. The  
4 interval  $[t_k, t_{k+1})$  is the time period corresponding to the  $k$ th day and  $T_l \in (0, 1)$  the fraction of the  
5 day of *low-activity* such that for interval  $[t_k, t_k + T_l)$  we have in each patch only resident population  
6 composed of  $N_i$  individuals ( $i = 1, 2$ ). Thus, the time interval  $[t_k, t_k + T_l)$  is named the *low-activity*  
7 period. For a fixed day  $k$ ,  $\alpha_i$  represents the proportion of the population from patch  $i$  that moves  
8 every day to another patch  $j$  at time  $t_k + T_l$  and returns to patch  $i$  at time  $t_{k+1}$ . Thus, human  
9 movement takes place on the time interval  $[t_k + T_l, t_{k+1})$  which is named the *high-activity* period.

10 For the low-activity period, the susceptible, infected and recovered human population from  
11 patch  $i$  are represented by  $S_i^l$ ,  $I_i^l$  and  $R_i^l$ , respectively, and the susceptible. The susceptible and  
12 infected vector population from patch  $i$  are represented by  $P_i$  and  $Q_i$ , respectively. On the other  
13 hand, for high-activity period, human population from patch  $i$  is divided into two subpopulations.  
14 The first subpopulation is composed of people from patch  $i$  who do not move to another patch, that  
15 is,  $(1 - \alpha_i)N_i$ . This subpopulation is subdivided into susceptible ( $S_{ii}^h$ ), infected ( $I_{ii}^h$ ) and recovered  
16 ( $R_{ii}^h$ ). The second subpopulation is composed of residents from patch  $j$  who move to patch  $i$ ,  $\alpha_j N_j$ .  
17 This subpopulation is subdivided into susceptible ( $S_{ji}^h$ ), infected ( $I_{ji}^h$ ) and recovered ( $R_{ji}^h$ ). Since  
18 we assume that the vector population does not move between patches, susceptible and infected  
19 vectors remain represented by  $P_i$  and  $Q_i$ , respectively. Thus, the following equations represent the  
20 dynamics of the populations for the low-activity period  $[t_k, t_k + T_l)$ :

$$\begin{aligned}\dot{S}_i^l(t) &= \mu_h N_{il} - \frac{\beta_i S_i^l(t) Q_i(t)}{N_{il}} - \mu_h S_i^l(t), \\ \dot{I}_i^l(t) &= \frac{\beta_i S_i^l(t) Q_i(t)}{N_{il}} - (\delta_i + \mu_h) I_i^l(t), \\ \dot{R}_i^l(t) &= \delta_i I_i^l(t) - \mu_h R_i^l(t), \\ \dot{P}_i(t) &= \Lambda_{vi} - \frac{\beta_{vi} P_i(t) I_i^l(t)}{N_{il}} - \mu_{vi} P_i(t), \\ \dot{Q}_i(t) &= \frac{\beta_{vi} P_i(t) I_i^l(t)}{N_{il}} - \mu_{vi} Q_i(t),\end{aligned}\tag{2}$$

21 where  $N_{il} := N_i$  and  $i = 1, 2$ .

1 For the high-activity period  $[t_k + T_l, t_{k+1})$ , the set of equations become:

$$\begin{aligned}
 \dot{S}_{ii}^h(t) &= (1 - \alpha_i)\mu_h N_{il} - \frac{\beta_i S_{ii}^h(t) Q_{ii}(t)}{N_{ih}} - \mu_h S_{ii}^h(t), \\
 \dot{I}_{ii}^h(t) &= \frac{\beta_i S_{ii}^h(t) Q_{ii}(t)}{N_{ih}} - (\delta_i + \mu_h) I_{ii}^h(t), \\
 \dot{R}_{ii}^h(t) &= \delta_i I_{ii}^h(t) - \mu_h R_{ii}^h(t), \\
 \dot{S}_{ji}^h(t) &= \alpha_j \mu_h N_{jl} - \frac{\beta_i S_{ji}^h(t) Q_{ii}(t)}{N_{ih}} - \mu_h S_{ji}^h(t), \\
 \dot{I}_{ji}^h(t) &= \frac{\beta_i S_{ji}^h(t) Q_{ii}(t)}{N_{ih}} - (\delta_i + \mu_h) I_{ji}^h(t), \\
 \dot{R}_{ji}^h(t) &= \delta_i I_{ji}^h(t) - \mu_h R_{ji}^h(t), \\
 \dot{P}_i(t) &= \Lambda_{vi} - \frac{\beta_{vi} P_i(t) (I_{ii}^h(t) + I_{ji}^h(t))}{N_{ih}} - \mu_{vi} P_i(t), \\
 \dot{Q}_i(t) &= \frac{\beta_{vi} P_i(t) (I_{ii}^h(t) + I_{ji}^h(t))}{N_{ih}} - \mu_{vi} Q_i(t),
 \end{aligned} \tag{3}$$

2 where  $N_{ih} := (1 - \alpha_i)N_i + \alpha_j N_j$ , and  $i, j = 1, 2, i \neq j$ . All model parameters are defined in Table  
3 1.

4 We observe that model (2)-(3) can be reduced to uncoupled patches in the form of system (2).  
5 This is done by taking  $Tl = 1$ , that is, having only low-activity periods.

| Parameter      | Meaning                                                                         |
|----------------|---------------------------------------------------------------------------------|
| $\alpha_i$     | Proportion of humans from patch $i$ who move to patch $j$ at time $t_k + T_l$ . |
| $N_i$          | Resident humans of patch $i$ .                                                  |
| $1/\mu_h$      | Average life time of humans.                                                    |
| $1/\mu_{vi}$   | Average life time of mosquitoes in patch $i$ .                                  |
| $\beta_i$      | Transmission rate from mosquito to human in patch $i$ .                         |
| $\beta_{vi}$   | Transmission rate from human to mosquito in patch $i$ .                         |
| $1/\delta_i$   | Average recovery time of humans in patch $i$ .                                  |
| $\Lambda_{vi}$ | Mosquito recruitment rate in patch $i$ .                                        |

Table 1: Parameter definition of model (2)-(3).

6 In order to study our coupled model (2)-(3), we first make an analysis for each system separately  
7 without considering a piecewise definition in time. Then, we focus on understanding the dynamics  
8 of the daily human movement.

### 9 2.1. Uncoupled case

10 System (2) is positively invariant in  $\Omega_i = \{(S_i^l, I_i^l, R_i^l, P_i, Q_i) \in \mathbb{R}^5 : S_i^l \geq 0, I_i^l \geq 0, R_i^l \geq$   
11  $0, S_i^l + I_i^l + R_i^l = N_{il}, P_i \geq 0, Q_i \geq 0, P_i + Q_i \leq \Lambda_{vi}/\mu_{vi}\}$  [21]. Then, the disease-free equilibrium  
12 of system (2) is given by  $(\bar{S}_i, \bar{I}_i, \bar{R}_i, \bar{P}_i, \bar{Q}_i) = (N_{il}, 0, 0, \Lambda_{vi}/\mu_{vi}, 0)$  and, using to the next generation

1 matrix approach as in [22], the basic reproductive number ( $R_{il}$ ) of uncoupled system is given by

$$R_{il} := \frac{\beta_i \beta_{v_i} \Lambda_{v_i}}{\mu_{v_i}^2 (\delta_i + \mu_h) N_{il}}. \quad (4)$$

2 Previous work [21] has shown that if  $R_{il} > 1$ , then there exists an endemic equilibrium ( $\tilde{S}_i, \tilde{I}_i, \tilde{R}_i, \tilde{P}_i, \tilde{Q}_i$ ),  
3 where

$$\begin{aligned} \tilde{S}_i &= \frac{\mu_h N_{il}^2}{\beta_i \tilde{Q}_i + \mu_h N_{il}}, & \tilde{I}_i &= \frac{\beta_i \mu_h N_{il} \tilde{Q}_i}{(\beta_i \tilde{Q}_i + \mu_h N_{il})(\delta_i + \mu_h)}, \\ \tilde{R}_i &= N_{il} - \tilde{S}_i - \tilde{I}_i, & \tilde{P}_i &= \frac{\Lambda_{v_i} (\beta_i \tilde{Q}_i + \mu_h N_{il})(\delta_i + \mu_h)}{\beta_{v_i} \beta_i \mu_h \tilde{Q}_i + \mu_{v_i} (\beta_i \tilde{Q}_i + \mu_h N_{il})(\delta_i + \mu_h)}, \\ \tilde{Q}_i &= \frac{\mu_h \mu_{v_i} N_{il} (\delta_i + \mu_h) [R_{il} - 1]}{\beta_i [\beta_{v_i} \mu_h + \mu_{v_i} (\delta_i + \mu_h)]}. \end{aligned} \quad (5)$$

4 In addition, authors in [21, 23] also have shown that the disease-free equilibrium is globally  
5 asymptotically stable (GAS) when  $R_{il} < 1$ , and the endemic equilibrium is GAS when  $R_{il} > 1$ .

6 For the high-activity period (3), we define  $S_{i*} := S_{ii}^h + S_{ji}^h$ ,  $I_{i*} := I_{ii}^h + I_{ji}^h$ ,  $R_{i*} := R_{ii}^h + R_{ji}^h$ ,  
7  $N_{ih} := S_{i*} + I_{i*} + R_{i*} = (1 - \alpha_i) N_{il} + \alpha_j N_{jl}$ . Thus, the dynamics of uncoupled system (3) can be  
8 written as:

$$\begin{aligned} \dot{S}_{i*}(t) &= \mu_h N_{ih} - \frac{\beta_i S_{i*}(t) Q_i(t)}{N_{ih}} - \mu_h S_{i*}(t), \\ \dot{I}_{i*}(t) &= \frac{\beta_i S_{i*}(t) Q_i(t)}{N_{ih}} - (\delta_i + \mu_h) I_{i*}(t), \\ \dot{I}_{i*}(t) &= \delta_i I_{i*}(t) - \mu_h R_{i*}(t), \\ \dot{P}_i(t) &= \Lambda_{v_i} - \frac{\beta_{v_i} P_i(t) I_{i*}(t)}{N_{ih}} - \mu_{v_i} P_i(t), \\ \dot{Q}_i(t) &= \frac{\beta_{v_i} P_i(t) I_{i*}(t)}{N_{ih}} - \mu_{v_i} Q_i(t), \end{aligned} \quad (6)$$

9 for each  $i = 1, 2$ .

10 Since the structure of system (6) is the same as (2), results concerning the stability of the  
11 equilibrium points are analogous to system (2). In particular, the disease-free and endemic  
12 equilibrium points are given by  $(N_{il}, 0, 0, \Lambda_{v_i}/\mu_{v_i}, 0)$  and  $(\tilde{S}_{i*}, \tilde{I}_{i*}, \tilde{R}_{i*}, \tilde{P}_{i*}, \tilde{Q}_{i*})$ , respectively, where

$$\begin{aligned} \tilde{S}_{i*} &= \frac{\mu_h N_{ih}^2}{\beta_i \tilde{Q}_{i*} + \mu_h N_{ih}}, & \tilde{I}_{i*} &= \frac{\beta_i \mu_h N_{ih} \tilde{Q}_{i*}}{(\beta_i \tilde{Q}_{i*} + \mu_h N_{ih})(\delta_i + \mu_h)}, \\ \tilde{R}_{i*} &= N_{ih} - \tilde{S}_{i*} - \tilde{I}_{i*}, & \tilde{P}_{i*} &= \frac{\Lambda_{v_i} (\beta_i \tilde{Q}_{i*} + \mu_h N_{ih})(\delta_i + \mu_h)}{\beta_{v_i} \beta_i \mu_h \tilde{Q}_{i*} + \mu_{v_i} (\beta_i \tilde{Q}_{i*} + \mu_h N_{ih})(\delta_i + \mu_h)}, \\ \tilde{Q}_{i*} &= \frac{\mu_h \mu_{v_i} N_{ih} (\delta_i + \mu_h) [R_{ih} - 1]}{\beta_i [\beta_{v_i} \mu_h + \mu_{v_i} (\delta_i + \mu_h)]}. \end{aligned} \quad (7)$$

13 In addition, the basic reproductive number ( $R_{ih}$ ) for uncoupled system (6) is given by

$$R_{ih} = \frac{\beta_i \beta_{v_i} \Lambda_{v_i}}{\mu_{v_i}^2 (\delta_i + \mu_h) N_{ih}}. \quad (8)$$

1 We observe that each  $R_{il}$  and  $R_{ih}$  does not depend on human movement, in this sense,  
2 the theoretical results on the existence and stability of the equilibrium points are given for the  
3 uncoupled system. However, when we the patches are coupled, these basic reproductive numbers  
4 loses meaning and only provide information when the patches are uncoupled. In this case, a global  
5  $R_0$  is not well defined so that we want to give an understanding of what occurs in each patch due  
6 to the movement depending on the local basic reproductive numbers.

### 7 **3. Effect of daily human movement on the endemic levels and the outbreaks**

8 In this section, we focus on understanding some effects due to daily human movement on the  
9 existence of the endemic equilibrium points and on the outbreaks for coupled model (2)-(3). For  
10 this, we proceed to study such effects in three stages. In the first stage, we characterize the  
11 local basic reproductive number and the endemic equilibrium values of each patch as a function  
12 of the total population size, in order to see how changes in the population affect both, the  $R_0$   
13 and equilibrium point values. In the second stage, we show the changes that the local basic  
14 reproductive numbers in each patch may experiment after migration. In the last stage, based on  
15 numerical studies, we evidence the effects of daily human movement on some characteristics of the  
16 dynamics such as the existence and disappearance of endemic equilibria, duration, size and peak  
17 of the outbreak.

#### 18 *3.1. Dependence on the basic reproductive number and the endemic equilibria as a function of* 19 *population size*

20 In general, the basic reproductive number ( $R_0$ ) and the endemic equilibrium ( $I^*$ ) of model  
21 (2)-(3) for a disconnected patch with human population  $N$  can be written as

$$R_0 = \frac{\beta\beta_v\Lambda_v}{\mu_v^2(\delta + \mu_h)N} \quad (9)$$

22 and

$$I^* = \frac{\beta\mu_hNQ^*}{(\beta Q^* + \mu_hN)(\delta + \mu_h)}, \text{ where } Q^* = \frac{\mu_h\mu_vN(\delta + \mu_h)[R_0 - 1]}{\beta[\beta_v\mu_h + \mu_v(\delta + \mu_h)]}. \quad (10)$$

23 From (9) and (10), we have that  $R_0 = 1$  at a point  $\bar{N} = \beta\beta_v\Lambda_v/[\mu_v^2(\delta + \mu_h)]$ , and  $I^*$  reaches  
24 its maximum at point  $\hat{N}$  given by

$$\hat{N} = \frac{-2\mu_v^2\beta\Lambda_v a + 2\mu_v\beta\Lambda_v\sqrt{\mu_v^2 a^2 + \mu_h\mu_v\beta_v a}}{2\mu_h\mu_v^3 a}, \quad (11)$$

25 where  $a = \delta + \mu_h$ . From Figure 1, we observe that a patch with  $N$  smaller (larger) than  $\bar{N}$  leads to  
26 have  $R_0 > 1$  ( $R_0 < 1$ ). The basic reproductive number is a measure that gives conditions for the  
27 existence of endemic equilibria and disease propagation in each patch separately. Thus,  $R_0 < 1$   
28 means that there is no favorable conditions for the disease spread, whereas  $R_0 > 1$  implies that the

- 1 conditions are favorable for an outbreak to occur in each disconnected patch. In addition, while
- 2  $N < \hat{N}$ , the value of the endemic equilibrium  $I^*$  increases as  $N$  grows up, and decreases when
- 3  $N > \hat{N}$ .

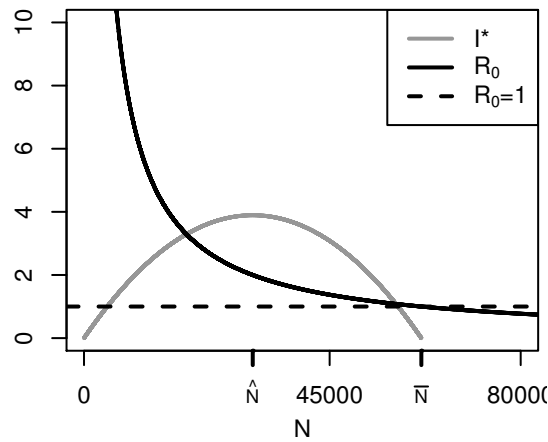

Figure 1:  $R_0$  and  $I^*$  versus  $N$ . Parameter values:  $\Lambda_v = 1200$ ,  $\beta = 0.25$ ,  $\beta_v = 0.15$ ,  $\mu_h = 0.000036$ ,  $\mu_v = 0.0714$ , and  $\delta = 0.1428$ .

#### 4 3.2. Changes in $R_0$ after one migration process

5 The findings in the previous subsection can be applied to see how the disease propagation  
6 conditions change in each patch when there is human migration between them. For this, we define  
7  $A$  as the net population that move between patches, that is,  $A := |\alpha_1 N_{1l} - \alpha_2 N_{2l}|$ . Table 2 shows  
8 a list of possible outcomes of the basic reproductive numbers after the interchange of populations  
9 from one patch to another. The results of Table 2 are based on the value of  $\bar{N}$  which is the  
10 threshold population that generates or not endemic equilibria. The first column of the table shows  
11 the value of the basic reproductive number in each patch before migration is considered ( $R_{1l}$  and  
12  $R_{2l}$ ). The second column shows the possible outcomes after a proportion of humans from patch 1  
13 moves to patch 2, and vice versa ( $R_{1h}$  and  $R_{2h}$ ). The third column displays the conditions that the  
14 populations must satisfy in order for every scenario to occur. The scenarios are used to understand  
15 the daily human movement between patches.

| Scenarios before migration    | Scenarios after migration     | Conditions                                                                                                                                                                      |
|-------------------------------|-------------------------------|---------------------------------------------------------------------------------------------------------------------------------------------------------------------------------|
| $R_{1l} < 1$ and $R_{2l} > 1$ | $R_{1h} < 1$ and $R_{2h} < 1$ | $N_{1h} = N_{1l} - A$ and $N_{2h} = N_{2l} + A$<br>where $\bar{N} - N_{2l} < A < N_{1l} - \bar{N}$                                                                              |
|                               | $R_{1h} < 1$ and $R_{2h} > 1$ | $N_{1h} = N_{1l} - A$ and $N_{2h} = N_{2l} + A$<br>where $A < \min \{N_{1l} - \bar{N}, \bar{N} - N_{2l}\}$<br><b>or</b><br>$N_{1h} = N_{1l} + A$ and $N_{2h} = N_{2l} - A$      |
|                               | $R_{1h} > 1$ and $R_{2h} < 1$ | $N_{1h} = N_{1l} - A$ and $N_{2h} = N_{2l} + A$<br>where $A > \max \{N_{1l} - \bar{N}, \bar{N} - N_{2l}\}$                                                                      |
|                               | $R_{1h} > 1$ and $R_{2h} > 1$ | $N_{1h} = N_{1l} - A$ and $N_{2h} = N_{2l} + A$<br>where $N_{1l} - \bar{N} < A < \bar{N} - N_{2l}$                                                                              |
| $R_{1l} < 1$ and $R_{2l} < 1$ | $R_{1h} < 1$ and $R_{2h} < 1$ | $N_{1h} = N_{1l} - A$ and $N_{2h} = N_{2l} + A$<br>where $A < N_{1l} - \bar{N}$<br><b>or</b><br>$N_{1h} = N_{1l} + A$ and $N_{2h} = N_{2l} - A$<br>where $A < N_{2l} - \bar{N}$ |
|                               | $R_{1h} < 1$ and $R_{2h} > 1$ | $N_{1h} = N_{1l} + A$ and $N_{2h} = N_{2l} - A$<br>where $A > N_{2l} - \bar{N}$                                                                                                 |
|                               | $R_{1h} > 1$ and $R_{2h} < 1$ | $N_{1h} = N_{1l} - A$ and $N_{2h} = N_{2l} + A$<br>where $A > N_{1l} - \bar{N}$                                                                                                 |
| $R_{1l} > 1$ and $R_{2l} > 1$ | $R_{1h} > 1$ and $R_{2h} > 1$ | $N_{1h} = N_{1l} + A$ and $N_{2h} = N_{2l} - A$<br>where $A < \bar{N} - N_{1l}$<br><b>or</b><br>$N_{1h} = N_{1l} - A$ and $N_{2h} = N_{2l} + A$<br>where $A < \bar{N} - N_{2l}$ |
|                               | $R_{1h} > 1$ and $R_{2h} < 1$ | $N_{1h} = N_{1l} - A$ and $N_{2h} = N_{2l} + A$<br>where $A > \bar{N} - N_{2l}$                                                                                                 |
|                               | $R_{1h} < 1$ and $R_{2h} > 1$ | $N_{1h} = N_{1l} + A$ and $N_{2h} = N_{2l} - A$<br>where $A > \bar{N} - N_{1l}$                                                                                                 |

Table 2: Possible scenarios for  $R_{1h}$  and  $R_{2h}$  after population exchange.

1 In order to show how the displacement of people from one patch to another may influence  
2 the disease propagation conditions, we examine the scenario  $R_{1l} < 1$  and  $R_{2l} > 1$ , i.e, during the  
3 low-activity period, in patch 1, the disease propagation conditions are not favorable, and in patch 2,  
4 the conditions are favorable. To this, we consider the following resident populations:  $N_{1l} = 90000$   
5 and  $N_{2l} = 45000$  for patch 1 and 2, respectively, and parameter values given in Table 3. Based  
6 on the parameter values, we obtain that  $R_{1l} = 0.68$  and  $R_{2l} = 1.37$ . Figure 2 shows under which  
7 conditions  $R_{1h}$  and  $R_{2h}$  are smaller or greater than 1, where the latter results in the existence of  
8 endemic equilibria according to  $\alpha_1$  and  $\alpha_2$  values. Note that Figure 2 shows only the first three  
9 outcomes for the case  $R_{1l} < 1$  and  $R_{2l} > 1$  given by Table 2. Observe that there are no values of  
10  $\alpha_1$  and  $\alpha_2$  where both  $R_{1h}$  and  $R_{2h}$  are simultaneously greater than 1.



| Parameter                    | Value    |
|------------------------------|----------|
| $\mu_h$                      | 0.000036 |
| $\mu_{v1}, \mu_{v2}$         | 0.0714   |
| $\beta_1, \beta_2$           | 0.25     |
| $\beta_{v1}, \beta_{v2}$     | 0.15     |
| $\delta_1, \delta_2$         | 0.1428   |
| $\Lambda_{v1}, \Lambda_{v2}$ | 1200     |

Table 3: Parameter values for the different scenarios. All parameter values are taken from [24]. Values for  $\Lambda_{v1}$  and  $\Lambda_{v2}$  are given in this study.

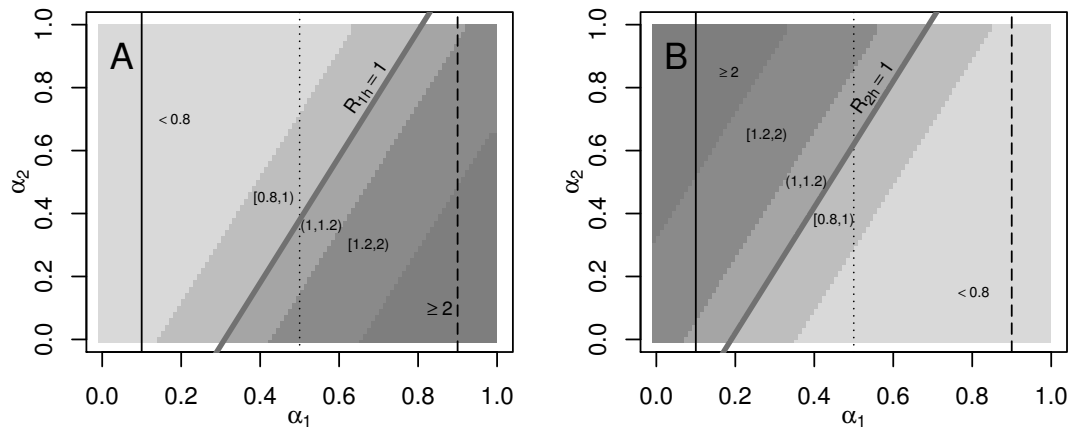

Figure 2: Value regions for  $R_{1h}$  and  $R_{2h}$  according to the  $\alpha_1$  and  $\alpha_2$  values for the scenario  $R_{1l} > 1$  and  $R_{2l} < 1$  in (A) patch 1 and (B) patch 2. The gray thick lines denotes the region where  $R_{1h} = 1$  (A) and  $R_{2h} = 1$  (B). The black lines drawn represent the scenarios that will be studied in the next section.

- 1 From now on, to study the effect of daily periodic movement with complete model (2)-(3), we
- 2 take variables  $I_1$  and  $I_2$  to represent infected residents from patches 1 and 2, respectively. That is,

$$I_i(t) = \begin{cases} I_i^l(t) & \text{if } t \in [t_k, t_k + T_l), \\ I_{ii}^h(t) + I_{ij}^h(t) & \text{if } t \in [t_k + T_l, t_{k+1}). \end{cases} \quad (12)$$

- 3 for  $i, j = 1, 2, i \neq j$ . Observe that  $I_i$  contabilize the infected individuals from patch  $i$ , no matter
- 4 where the disease was acquired.

### 5 3.3. Numerical studies

- 6 In this subsection, we study, by means of numerical simulations, some effects of daily human
- 7 movement on characteristics of the coupled model solutions, such as the existence of endemic
- 8 equilibria, and the start, duration, and amplitude of the outbreak.

#### 9 3.3.1. Disappearance and appearance of endemic equilibria

- 10 Here we show the importance of  $T_l$ ,  $\alpha_1$  and  $\alpha_2$  on the existence of endemic equilibria when
- 11  $R_{1l} < 1$  and  $R_{2l} > 1$ . We present numerical simulations for different combinations of these
- 12 parameters to observe whether or not the existence of endemic equilibria of the uncoupled patches

1 is preserved. Here we study the following cases of the presented scenario in Figure 2:  $\alpha_1 = 0.1$   
 2 (black solid line),  $\alpha_1 = 0.5$  (black dotted line), and  $\alpha_1 = 0.9$  (black dashed line), and for every case,  
 3 we vary  $\alpha_2$  in  $[0, 1]$  and  $T_l$  in  $[0.1, 0.9]$ . Figures 3 to 6 summarize the results of these experiments  
 4 where we show the values of asymptotic solutions of  $I_1$  and  $I_2$  respect to parameters  $\alpha_2$  and  $T_l$ .  
 5 These values will give us an endemic state or a disease-free state.

6 • **Case  $\alpha_1 = 0.1$**

7 From Figure 2, theoretically  $R_{1l} < 1$  and  $R_{1h} < 1$ , that is, there are no favorable conditions  
 8 at any time during the day in patch 1 for an endemic equilibrium to exist. However, from  
 9 Figure 3, there exists an endemic equilibrium of patch 1 for almost any combination of  $\alpha_2$   
 10 and  $T_l$  values. Taking  $\alpha_1 = 0.1$ , that is, 10% of individuals from patch 1 move to patch 2,  
 11 generates endemic levels in patch 1. In general, while the resident people from patch 2 spends  
 12 more time every day in their own patch, the dynamics are dominated by the theoretical values  
 13 of  $R_{2l}$  and  $R_{2h}$  which are greater than 1.

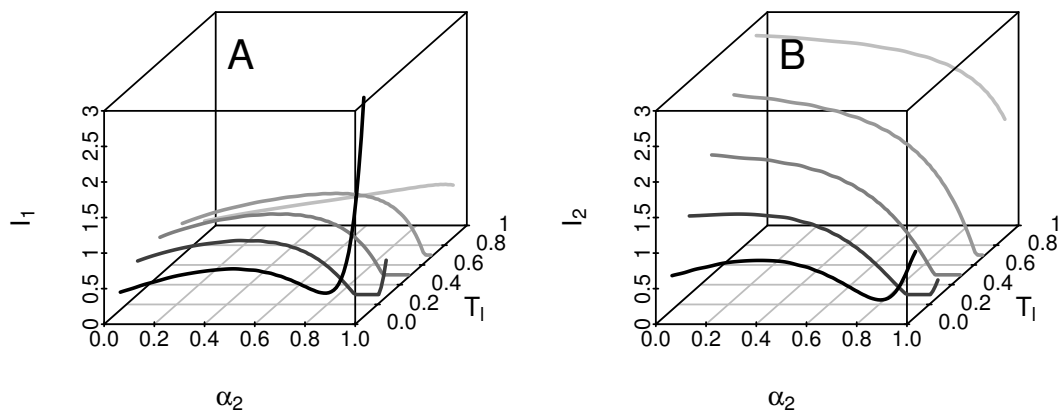

Figure 3: Existence of endemic equilibria for (A)  $I_1$  and (B)  $I_2$ , against  $\alpha_2$  and  $T_l$  for case  $\alpha_1 = 0.1$ . Population sizes  $N_{1l} = 90000$  and  $N_{2l} = 45000$ .

14 From Figure 3, for values of  $\alpha_2$  close to 1 and  $T_l$  approximately 0.5, the opposite scenario  
 15 also occurs. If in a patch there are favorable conditions for the existence of endemic levels  
 16 all the time ( $R_{2l} > 1$  and  $R_{2h} > 1$ ), we might get no endemic equilibrium in any patch.  
 17 To get a better understanding of this phenomenon, we examine the behavior of the endemic  
 18 equilibrium from patches when  $\alpha_2 = 1.0$ . Figure 4 shows the existence of endemic equilibria  
 19 of  $I_1$  and  $I_2$  for  $N_{1l} = 90000$  with  $N_{2l} = 45000$  (black solid lines) and  $N_{2l} = 18000$  (black  
 20 dashed lines) when  $\alpha_1 = 0.1$  and  $\alpha_2 = 1.0$ . For  $N_{1l} = 90000$  and  $N_{2l} = 45000$ , we have that  
 21  $R_{1l} = 0.68$ ,  $R_{2l} = 1.37$ ,  $R_{1h} = 0.49$  and  $R_{2h} = 6.86$ . We observe that there is a set of  $T_l$   
 22 values where the disease disappears in both patches when  $N_{2l} = 45000$ . This phenomenon is  
 23 explained as follows. Since  $\alpha_1 = 0.1$  and  $\alpha_2 = 1.0$ , then, at the beginning of the high-activity  
 24 period, 10% of the population from patch 1 moves to patch 2 and the whole population from

1 patch 2 moves to patch 1. In the extreme case  $T_l = 0.9$  (the low-activity period is very  
 2 large), there is an endemic equilibrium in patch 2 due to the fact that almost all the time  
 3 the population remains in their residence patch and the basic reproductive number ( $R_{2l}$ )  
 4 is greater than 1. In this case, we could approximate the  $R_0$  value of patch 2 by the  $R_0$   
 5 value of the disconnected patches. For individuals residing in patch 1, we observe that by  
 6 taking 10% of individuals from patch 1 who move to patch 2, for a short time period, it  
 7 is sufficient to generate endemic levels in patch 1 despite theoretically  $R_{1l}$  and  $R_{1h}$  are less  
 8 than 1. Now, for the extreme case  $T_l = 0.1$  (short low-activity period), the presence of an  
 9 endemic level in patch 1 is due to the fact that most of the time the 10% of the population  
 10 that belongs to patch 1, is in patch 2. This 10% carries the endemic levels acquired in patch  
 11 2 and take it to patch 1. The endemic levels in patch 2 are due to the presence of endemic  
 12 levels of mosquitoes that are present in the medium due to the 10% of individuals from  
 13 patch 1. Finally, for intermediate values of  $T_l$ , the disease disappears in both patches. For  
 14 this scenario, both, the resident individuals from patch 2 and the visiting population from  
 15 patch 1 spend almost the same time in each patch. As the basic reproductive numbers are  
 16 smaller than 1 in patch 1 and larger than 1 in patch 2, we need to know why the disease  
 17 cannot be sustained by patch 2. When populations are in patch 2, they do not stay long  
 18 enough to increase the number of new infected individuals significantly. When individuals  
 19 move to patch 1, the infective process is much less than in patch 2 (as  $R_{1l} = 0.68 < 1$   
 20 and  $R_{1h} = 0.49 < 1$ ) and new infections are imperceptible as the corresponding values of  
 21 the basic reproductive numbers are very small and not close to 1. The overall effect leads  
 22 to having a small enough infection rate compared to the disease recovery process and the  
 23 disease disappears in both patches. However, from Figure 4, this region of disease extinction  
 24 disappears when  $N_{2l}$  decreases to 18000 (black dashed lines). In this case, we have that  $R_{1h}$   
 25 goes up from 0.49 to 0.62 and the region of disease extinction disappear.

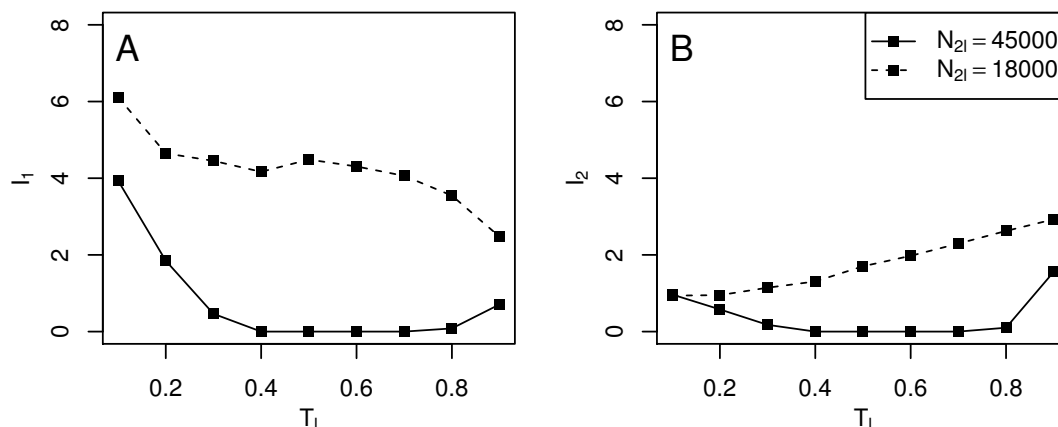

Figure 4: Existence of endemic equilibria for (A)  $I_1$  and (B)  $I_2$ , for  $\alpha_1 = 0.1$  and  $\alpha_2 = 1.0$ , and population sizes from patch 2 as  $N_{2l} = 45000$  (black solid line) and  $N_{2l} = 18000$  (black dashed line).

1 • **Cases  $\alpha_1 = 0.5$  and  $\alpha_1 = 0.9$**

2 A similar behavior of existence and non-existence of endemic equilibria arise for these values  
3 of  $\alpha_1$  and scenario  $R_{1l} < 1$  and  $R_{2l} > 1$ .

4 Figure 5 displays the existence of endemic equilibria of infected residents  $I_1$  and  $I_2$  for  $\alpha_1 =$   
5 0.5. For long periods of low-activity ( $T_l \geq 0.7$ ), there are endemic levels in both patches,  
6 except for some values of  $\alpha_2$  and  $T_l$ . In this case ( $\alpha_1 = 0.5$ ), the region of disease extinction  
7 is larger than case  $\alpha_1 = 0.1$ . Here, the effect of human movement is more pronounced due to  
8 the fact that, for  $\alpha_1 = 0.5$ , the values of the basic reproductive numbers for the high-activity  
9 period in both patches are in the interval  $[0.68, 1.37]$ , whereas for  $\alpha_1 = 0.1$ , even though  $R_{1h}$   
10 is smaller than 1 ( $R_{1h} \in [0.49, 0.76]$ ),  $R_{2h}$  takes values in the interval  $[1.14, 6.54]$  (see Figure  
11 2).

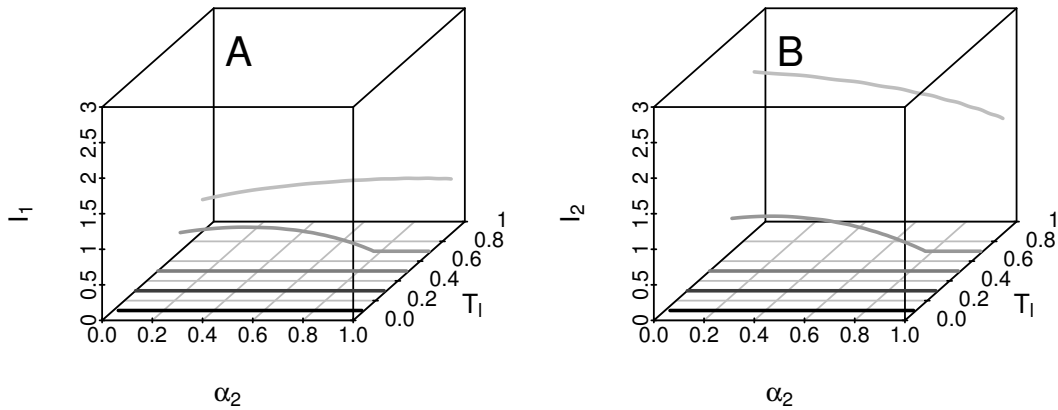

Figure 5: Existence of endemic equilibria for (A)  $I_1$  and (B)  $I_2$ , against  $\alpha_2$  and  $T_l$  for case  $\alpha_1 = 0.5$ . Population sizes  $N_{1l} = 90000$  and  $N_{2l} = 45000$ .

12 Regions of disease extinction can be more complex as is observed in Figure 5, which shows  
13 the existence of endemic equilibria of  $I_1$  and  $I_2$  in case  $\alpha_1 = 0.9$ . As in the case  $\alpha_1 = 0.1$  and  
14  $\alpha_1 = 0.5$ , although there are favorable conditions for the existence of endemic equilibria in  
15 one of the patches during the low-activity period, the disease disappears for a set of values  
16 of  $\alpha_2$  and  $T_l$ . For this scenario, the values of  $R_{1h}$  and  $R_{2h}$  are opposite to  $R_{1l}$  and  $R_{2l}$ , that  
17 is,  $R_{1h} > 1$  and  $R_{2h} < 1$ . Clearly, depending on the settings of parameters  $\alpha_1$ ,  $\alpha_2$ ,  $T_l$  and  
18 the intensity of the basic reproductive numbers (values of  $R_{1l}$ ,  $R_{2l}$ ,  $R_{1h}$  and  $R_{2h}$ ), different  
19 regions of disease extinction can be obtained as observed in Figure 6.

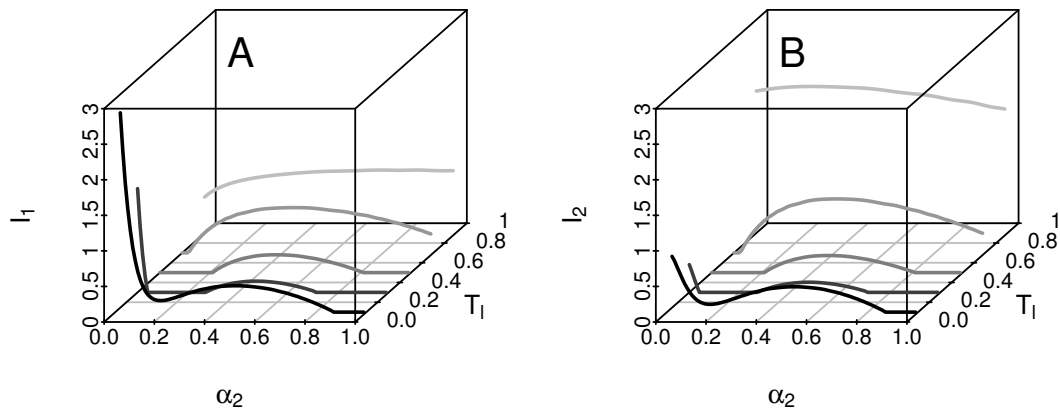

Figure 6: Existence of endemic equilibria for (A)  $I_1$  and (B)  $I_2$ , against  $\alpha_2$  and  $T_l$  for case  $\alpha_1 = 0.9$ . Population sizes  $N_{1l} = 90000$  and  $N_{2l} = 45000$ .

### 1 3.3.2. Effect on the outbreaks

2 In this subsection, we present scenarios to observe some effects of the periodic human movement  
3 on the outbreak dynamics. The parameter values from Table 3 are used for the numerical simulations.

#### 4 • Disappearance of outbreaks

5 We first explore the scenario given in Subsection 3.3.1, where conditions for the emergence  
6 of an outbreak exist only in one of the patches. The purpose is to analyze the complete  
7 outbreak in a scenario where the disease disappears.

8 As we have seen in Figure 3, there are no endemic equilibria in any patch for  $\alpha_2$  values close  
9 to 1 and  $T_l$  in  $[0.4, 0.7]$ . From Figure 7, we observe that there is an outbreak in patch 2 but  
10 not in patch 1 when the patches are uncoupled (see dashed lines), which coincides with the  
11 fact that  $R_{1l} < 1$  and  $R_{2l} > 1$  ( $R_{1l} = 0.68$  and  $R_{2l} = 1.37$ ). If we take  $\alpha_1 = 0.1$  and  $\alpha_2 = 1.0$ ,  
12 implies that  $R_{1h} = 0.49$  and  $R_{2h} = 6.86$ . Under this scenario, from Figure 7, we notice there  
13 are outbreaks in both patches for very long periods of high-activity ( $T_l = 0.1$ ) and very long  
14 periods of low-activity ( $T_l = 0.9$ ). However, for  $T_l$  values in  $[0.4, 0.7]$ , outbreaks disappear in  
15 both patches. That means that this combination of parameters affects not only the existence  
16 of endemic equilibria but also the complete existence of the outbreak.

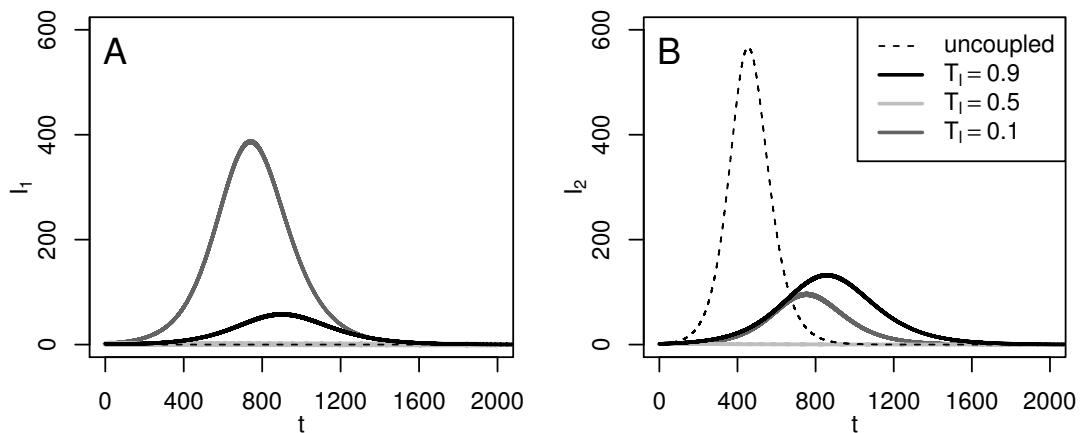

Figure 7: Disappearance of outbreaks. Numerical solutions of infected residents (A)  $I_1$  and (B)  $I_2$ , for  $N_{1l} = 90000$ ,  $N_{2l} = 45000$ ,  $\alpha_1 = 0.1$  and  $\alpha_2 = 1.0$ .

### • Emergence of outbreaks

Here we show the scenario where even though there are no conditions in any of the patches for the existence of an outbreak when patches are uncoupled, there is one due to the human movement. For this, human populations are taken as  $N_{1l} = N_{2l} = 70000$ , and  $\alpha_1 = 0$  and  $\alpha_2 = 0.9$ . For uncoupled patches, there is no outbreak in both patches which coincides with the fact that both  $R_{1l}$  and  $R_{2l}$  are smaller than 1 ( $R_{1l} = R_{2l} = 0.88$ ), and, when there is human movement, theoretically  $R_{1h} = 0.46$ , and  $R_{2h} = 8.82$ . From Figure 8, we observe that an outbreak appears in both patches when  $T_l = 0.5$  approximately and becomes longer as the high-activity period increases. In addition, the time in which the outbreak reaches the highest incidence of cases occurs earlier and is larger as  $T_l$  decreases. This phenomenon occurs because as the high-activity period increases, the dynamics of patch 2 are governed by  $R_{2h} = 8.82$ , generating earlier and larger outbreaks in patch 2. For patch 1, in contrast to Figure 7, there is an outbreak in patch 1 despite the fact that there are no favorable conditions for the disease development ( $R_{1l} = 0.88$  and  $R_{1h} = 0.46$ ). However, as outbreaks appear earlier in patch 2 than in patch 1, those infected individuals from patch 2, who move to patch 1 (90% of individuals), interact with mosquitoes from patch 1, generating an outbreak in that patch.

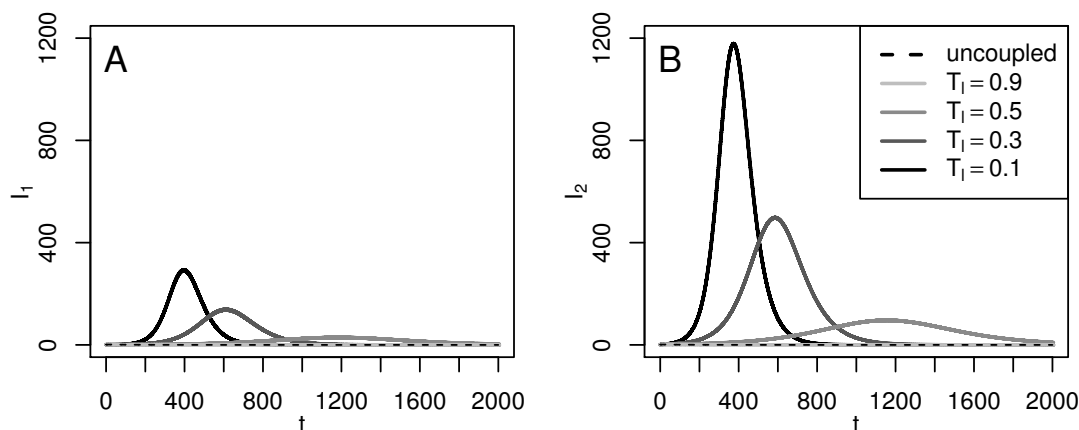

Figure 8: Emergence of outbreaks. Numerical solutions of infected residents (A)  $I_1$  and (B)  $I_2$ , for  $N_{1l} = N_{2l} = 70000$ ,  $\alpha_1 = 0$  and  $\alpha_2 = 0.9$ .

1     • **Delay and advance of outbreaks**

2     To end our study cases, we present scenarios where delay and advance of outbreaks are  
3     observed when patches separately have conditions for the existence of outbreaks.

4     We first take  $N_{1l} = 50000$ ,  $N_{2l} = 15000$ ,  $\alpha_1 = 0.5$  and  $\alpha_2 = 0.1$ . For these values, we obtain  
5      $R_{1l} = 1.23$ ,  $R_{2l} = 4.11$ ,  $R_{1h} = 2.33$  and  $R_{2h} = 1.60$ . In Figure 9, we notice that if the patches  
6     are uncoupled (black dashed lines), the dynamics of both patches are governed by the  $R_{1l}$   
7     and  $R_{2l}$  values. In this case, the maximum incidence of cases in patch 2 is greater than in  
8     patch 1, which coincides with the fact that  $R_{2l}$  is much larger than  $R_{1l}$ . Compared to the  
9     dynamics of the decoupled patches, the outbreaks for  $T_l = 0.98$  occur earlier in patch 1, and  
10    the one in patch 2 remains practically the same. In this case, the temporal dynamics of the  
11    uncoupled system are inherited, that is, although the behavior of the outbreak in patch 1  
12    is preserved, this outbreak is advanced because patch 2 has a high incidence of cases. As  
13    the high-activity period increases, the maximum incidence in patch 1 goes up and the one  
14    in patch 2 decreases. In addition, the outbreak in patch 2 is delayed as  $T_l$  goes from 0.98  
15    to 0.02. Clearly, these effects are due to  $R_{1l} < R_{2l}$  for the low-activity period, but during  
16    the high-activity period, the intensity of the basic reproductive numbers is inverted, that is,  
17     $R_{1h} > R_{2h}$ .

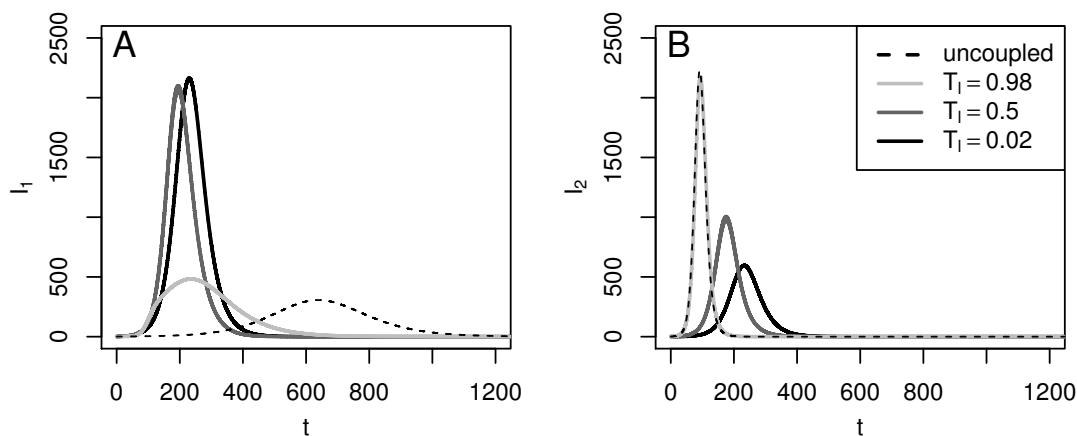

Figure 9: Delay and advance of the outbreaks. Numerical solutions of infected residents (A)  $I_1$  and (B)  $I_2$ , for  $N_{1l} = 50000$ ,  $N_{2l} = 15000$ ,  $\alpha_1 = 0.5$  and  $\alpha_2 = 0.1$ .

1 Finally, we set  $N_{1l} = N_{2l} = 45000$ ,  $\alpha_1 = 0.2$  and  $\alpha_2 = 0.8$ . Thus, we have that  $R_{1l} = R_{2l} =$   
 2  $1.37$ ,  $R_{1h} = 0.85$  and  $R_{2h} = 3.43$ . In Figure 10, we observe that there are outbreaks when  
 3 patches are uncoupled (black dashed lines) and these appear earlier when the coupled model  
 4 is taken into account. Also, the maximum incidence of cases increase as the high-activity  
 5 period gets longer. In general, this behavior is observed for different settings of  $\alpha_1$  and  
 6  $\alpha_2$ . To get a better understanding of outbreaks behavior, we analyse how the  $R_{1h}$  and  $R_{2h}$   
 7 values change according to proportions of people who move between patches ( $\alpha_1$  and  $\alpha_2$ ). In  
 8 fact, since the conditions of disease spread are identical in both patches, this scenario can be  
 9 studied directly considering only the net population that moved between patches (A), defined  
 10 in Subsection 3.2. For this, we assume, without loss of generality,  $R_{1h} < R_{2h}$ . From Figure  
 11 11, we have that while  $R_{1h}$  decreases,  $R_{2h}$  take very large values. In fact,  $R_{1h} \in [0.68, 1.37]$ ,  
 12 while  $R_{2h}$  can be greater than 20. That is, while  $R_{2h}$  take values very high and  $R_{1h}$  is at  
 13 least 0.68, the outbreaks appear earlier and the maximum incidence of cases increase.

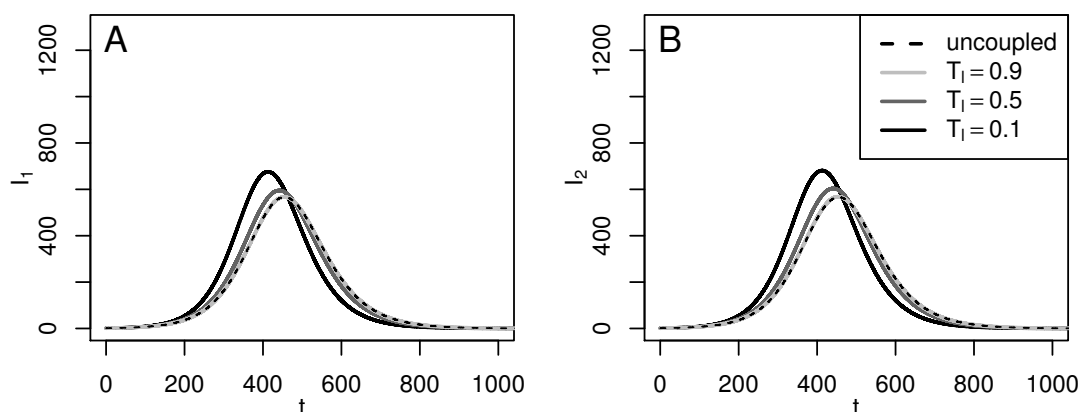

Figure 10: Advance of the outbreaks. Numerical solutions for infected residents (A)  $I_1$  and (B)  $I_2$ , for  $N_1 = N_2 = 45000$ ,  $\alpha_1 = 0.2$  and  $\alpha_2 = 0.8$ .



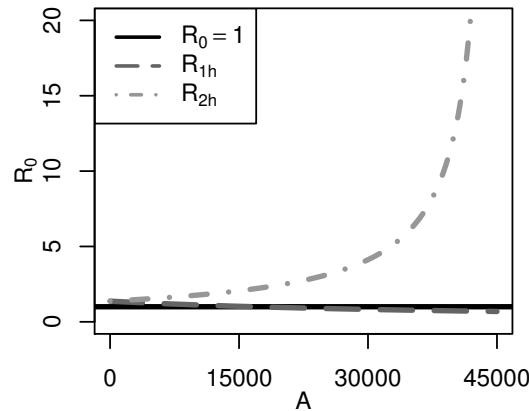

Figure 11: Values of  $R_{1h}$  and  $R_{2h}$  according to the net population that moves between patches ( $A$ )

#### 1 4. Conclusion and discussion

2 In this work, our goal was to investigate how the daily human movement affects some characteristics  
3 of dengue dynamics based on a two-patch model. The model assumed that the patches are  
4 connected by the periodic human movement at discrete times. Given the complexity of the model  
5 dynamics, an explicit expression could not be found for the basic reproductive number and the  
6 endemic equilibrium points. However, knowing the structure and stability of the equilibrium points  
7 and the basic reproductive numbers of the uncoupled system have been useful to determine when  
8 there could be favorable or unfavorable conditions for the existence of endemic equilibrium points  
9 and outbreaks for the complete model.

10 This work studies the effects of daily commuters on the disease dynamics under a little-explored  
11 approach, different from what is traditionally applied to multi-patch models. We believe that  
12 modeling the disease spread where the division of more than one region is clearly defined, needs to  
13 be analyzed with a more complete view. Thus, this approach is useful when there are well-defined  
14 regions where there is daily human movement between them. Moreover, mixing information from  
15 different regions to model it as a single region through a one-patch model without considering  
16 movement might give rise to different dynamics than those found in this work. In addition, under  
17 this approach, it is possible to recognize where individuals became infected. This fact is important  
18 because before applying control measures against possible outbreaks, we should recognize if the  
19 cases were imported or autochthonous.

20 Our scenarios focused on understanding only the effect of human movement on endemic disease  
21 levels and on the outbreak dynamics. Some cases of interest were, for example, that although there  
22 are regions with disease propagation conditions, the disease do not necessarily subsist. In addition,  
23 there could be regions without favorable conditions for the development of the disease, but human  
24 movement might lead to the appearance of outbreaks as seen in [25], where the main carriers of  
25 the disease between patches is cattle. However, the advantage of the scenarios presented in this

1 work is that it is possible to have a better biological description of the phenomenon.

2 From Figures 3 to 6, the region of disease extinction varies greatly. We have observed that  
3 these regions become larger when the basic reproductive numbers of the uncoupled patches are  
4 relatively close to 1. Thus, this fact is dependent on the size of interacting populations and the  
5 time spent by the populations in their residence patch. These results are not intuitive and might  
6 have not been observed unless the movement between two patches is considered.

7 Other different scenarios might occur if we assume that the patches have different propagation  
8 intensity not related to humans. For example, regions with different sanitary measures or with  
9 abundant vegetation could lead to different rates of transmission from humans to mosquitoes or  
10 vice versa, mosquito mortality rate, and mosquito recruitment rate. In fact, Table 2 could be  
11 generalized considering that the parameters values are not the same in both patches. Also, the  
12 model can be extended to a network of patches where individuals from each patch spend different  
13 high-activity and low-activity periods in neighboring patches. This extended model might give rise  
14 other effects not reported in this work.

15 Our approach can be useful not only for vector-borne diseases such as zika or chikungunya  
16 but also for those with direct transmission such as SARS and COVID-19, diseases which might  
17 generate pandemics due to human movement. In this respect, an infected human might be  
18 exposed to different populations during its complete period of infection, leading to a more complex  
19 understanding of the basic reproductive number and the disease dynamics. Moreover, to obtain a  
20 generalization of the basic reproductive number for our complete model might be useful to establish  
21 control policies that consider the human movement.

22 Finally, although the study was mostly computational, it was quite complex. This is due to the  
23 number of parameters involved in the model dynamics such as the population sizes of both patches,  
24 the proportion of people moving between patches and the time period that individuals spend in  
25 their residence patch. Therefore, it is not easy to have a complete theoretical understanding of  
26 a system of this nature; however, it was useful to know some properties of the uncoupled model  
27 dynamics.

## 28 **Declarations of interest**

29 None.

## 30 **Funding**

31 This work was supported by the project DCEN-USO315002889 from the University of Sonora  
32 and in part to one of the authors by CONACYT doctoral fellowship.

## 1 References

- 2 [1] S. Bhatt, P. W. Gething, O. J. Brady, J. P. Messina, A. W. Farlow, C. L. Moyes, J. M. Drake,  
3 J. S. Brownstein, A. G. Hoen, O. Sankoh, M. F. Myers, D. B. George, T. Jaenisch, G. R. W.  
4 Wint, C. P. Simmons, T. W. Scott, J. J. Farrar, S. I. Hay, The global distribution and burden  
5 of dengue, *Nature* 496 (2013) 504–507. doi:[10.1038/nature12060](https://doi.org/10.1038/nature12060).
- 6 [2] WHO, Dengue and severe dengue, 2019. URL: [https://www.who.int/news-room/  
7 fact-sheets/detail/dengue-and-severe-dengue](https://www.who.int/news-room/fact-sheets/detail/dengue-and-severe-dengue).
- 8 [3] O. J. Brady, P. W. Gething, S. Bhatt, J. P. Messina, J. S. Brownstein, A. G. Hoen, C. L.  
9 Moyes, A. W. Farlow, T. W. Scott, S. I. Hay, Refining the Global Spatial Limits of Dengue  
10 Virus Transmission by Evidence-Based Consensus, *PLoS Neglected Tropical Diseases* 6 (2012).  
11 doi:[10.1371/journal.pntd.0001760](https://doi.org/10.1371/journal.pntd.0001760).
- 12 [4] S. T. Stoddard, A. C. Morrison, G. M. Vazquez-prokopec, V. P. Soldan, J. Tadeusz, U. Kitron,  
13 J. P. Elder, T. W. Scott, The Role of Human Movement in the Transmission of Vector-Borne  
14 Pathogens, *PLoS neglected tropical diseases* 3 (2009). doi:[10.1371/journal.pntd.0000481](https://doi.org/10.1371/journal.pntd.0000481).
- 15 [5] S. T. Stoddard, B. M. Forshey, A. C. Morrison, V. A. Paz-soldan, G. M. Vazquez,  
16 House-to-house human movement drives dengue virus transmission, *Proceedings of the  
17 National Academy of Sciences of the United States of America* 110 (2013) 994–999. doi:[10.  
18 1073/pnas.1213349110](https://doi.org/10.1073/pnas.1213349110).
- 19 [6] H. P. Mohammed, M. M. Ramos, A. Rivera, M. Johansson, J. L. Muñoz-Jordan, W. Sun,  
20 K. M. Tomashek, Travel-associated dengue infections in the United States, 1996 to 2005,  
21 *Journal of Travel Medicine* 17 (2010) 8–14. doi:[10.1111/j.1708-8305.2009.00374.x](https://doi.org/10.1111/j.1708-8305.2009.00374.x).
- 22 [7] B. Adams, D. D. Kapan, Man bites mosquito: Understanding the contribution of human  
23 movement to vector-borne disease dynamics, *PLoS ONE* 4 (2009). doi:[10.1371/journal.  
24 pone.0006763](https://doi.org/10.1371/journal.pone.0006763).
- 25 [8] K. R. Porter, C. G. Beckett, H. Kosasih, R. I. Tan, B. Alisjahbana, P. Irani, F. Rudiman,  
26 S. Widjaja, E. Listiyaningsih, Epidemiology of dengue and dengue hemorrhagic fever in a  
27 cohort of adults living in Bandung, West Java, Indonesia, *The American Journal of Tropical  
28 Medicine and Hygiene* 72 (2005) 60–66. doi:[10.4269/ajtmh.2005.72.60](https://doi.org/10.4269/ajtmh.2005.72.60).
- 29 [9] C. Cosner, Models for the effects of host movement in vector-borne disease systems,  
30 *Mathematical Biosciences* 270 (2015) 192–197. doi:[10.1016/j.mbs.2015.06.015](https://doi.org/10.1016/j.mbs.2015.06.015).
- 31 [10] M. A. Aziz-Alaoui, S. Gakkhar, B. Ambrosio, A. Mishra, A network model for control of  
32 dengue epidemic using sterile insect technique, *Mathematical Biosciences and Engineering* 15  
33 (2017) 441–460. doi:[10.3934/mbe.2018020](https://doi.org/10.3934/mbe.2018020).

- 1 [11] A. Mishra, S. Gakkhar, Non-linear Dynamics of Two-Patch Model Incorporating Secondary  
2 Dengue Infection, *International Journal of Applied and Computational Mathematics* 4 (2018).  
3 doi:[10.1007/s40819-017-0460-z](https://doi.org/10.1007/s40819-017-0460-z).
- 4 [12] R. W. S. Hendron, M. B. Bonsall, The interplay of vaccination and vector control on small  
5 dengue networks, *Journal of Theoretical Biology* 407 (2016) 349–361. doi:[10.1016/j.jtbi.](https://doi.org/10.1016/j.jtbi.2016.07.034)  
6 [2016.07.034](https://doi.org/10.1016/j.jtbi.2016.07.034).
- 7 [13] Y. Xiao, X. Zou, Transmission dynamics for vector-borne diseases in a patchy environment,  
8 *Journal of Mathematical Biology* 69 (2014) 113–146. doi:[10.1007/s00285-013-0695-1](https://doi.org/10.1007/s00285-013-0695-1).
- 9 [14] J. Arino, P. Van Den Driessche, A multi-city epidemic model, *Mathematical Population*  
10 *Studies* 10 (2003) 175–193. doi:[10.1080/08898480306720](https://doi.org/10.1080/08898480306720).
- 11 [15] G. R. Phaijoo, D. B. Gurung, Mathematical Study of Dengue Disease Transmission in  
12 Multi-Patch Environment, *Applied Mathematics* (2016) 1521–1533. doi:[10.4236/am.2016.](https://doi.org/10.4236/am.2016.714132)  
13 [714132](https://doi.org/10.4236/am.2016.714132).
- 14 [16] S. Lee, C. Castillo-Chavez, The role of residence times in two-patch dengue transmission  
15 dynamics and optimal strategies, *Journal of Theoretical Biology* 374 (2015) 152–164. doi:[10.](https://doi.org/10.1016/j.jtbi.2015.03.005)  
16 [1016/j.jtbi.2015.03.005](https://doi.org/10.1016/j.jtbi.2015.03.005).
- 17 [17] D. Bichara, C. Castillo-Chavez, Vector-borne diseases models with residence times - A  
18 Lagrangian perspective, *Mathematical Biosciences* 281 (2016) 128–138. doi:[10.1016/j.mbs.](https://doi.org/10.1016/j.mbs.2016.09.006)  
19 [2016.09.006](https://doi.org/10.1016/j.mbs.2016.09.006).
- 20 [18] J. E. Kim, H. Lee, C. H. Lee, S. Lee, Assessment of optimal strategies in a two-patch dengue  
21 transmission model with seasonality, *PLoS ONE* 12 (2017) 1–21. doi:[10.1371/journal.pone.](https://doi.org/10.1371/journal.pone.0173673)  
22 [0173673](https://doi.org/10.1371/journal.pone.0173673).
- 23 [19] E. Barrios, S. Lee, O. Vasilieva, Assessing the effects of daily commuting in two-patch dengue  
24 dynamics: A case study of Cali, Colombia, *Journal of Theoretical Biology* 453 (2018) 14–39.  
25 doi:[10.1016/j.jtbi.2018.05.015](https://doi.org/10.1016/j.jtbi.2018.05.015).
- 26 [20] E. A. Mpolya, K. Yashima, H. Ohtsuki, A. Sasaki, Epidemic dynamics of a vector-borne  
27 disease on a villages-and-city star network with commuters, *Journal of Theoretical Biology*  
28 343 (2014) 120–126. doi:[10.1016/j.jtbi.2013.11.024](https://doi.org/10.1016/j.jtbi.2013.11.024).
- 29 [21] L. Esteva, C. Vargas, Analysis of a dengue disease transmission model, *Mathematical*  
30 *Biosciences* 150 (1998) 131–151. doi:[10.1016/S0025-5564\(98\)10003-2](https://doi.org/10.1016/S0025-5564(98)10003-2).
- 31 [22] F. Brauer, C. Castillo-chavez, A. Mubayi, S. Towers, Some models for epidemics of  
32 vector-transmitted diseases, *Infectious Disease Modelling* (2016) 1–9. URL: [http://dx.doi.](http://dx.doi.org/10.1016/j.idm.2016.08.001)  
33 [org/10.1016/j.idm.2016.08.001](http://dx.doi.org/10.1016/j.idm.2016.08.001). doi:[10.1016/j.idm.2016.08.001](https://doi.org/10.1016/j.idm.2016.08.001).

- 1 [23] M. O. Souza, Multiscale analysis for a vector-borne epidemic model, *Journal of Mathematical*  
2 *Biology* 68 (2014) 1269–1293. doi:[10.1007/s00285-013-0666-6](https://doi.org/10.1007/s00285-013-0666-6). [arXiv:1108.1999](https://arxiv.org/abs/1108.1999).
- 3 [24] M. Andraud, N. Hens, C. Marais, P. Beutels, Dynamic epidemiological models for dengue  
4 transmission: a systematic review of structural approaches., *PloS one* 7 (2012) e49085. doi:[10.](https://doi.org/10.1371/journal.pone.0049085)  
5 [1371/journal.pone.0049085](https://doi.org/10.1371/journal.pone.0049085).
- 6 [25] M. A. Acuña Zegarra, D. Olmos-Liceaga, J. X. Velasco-Hernández, The role of animal grazing  
7 in the spread of chagas disease, *Journal of Theoretical Biology* 457 (2018) 19–28. doi:[10.](https://doi.org/10.1016/j.jtbi.2018.08.025)  
8 [1016/j.jtbi.2018.08.025](https://doi.org/10.1016/j.jtbi.2018.08.025).
